# Supplementary figures and images for: Pervasive translation in Mycobacterium tuberculosis
Source: eLife journal article supplement (doi:10.7554/elife.73980), 2022-03-28

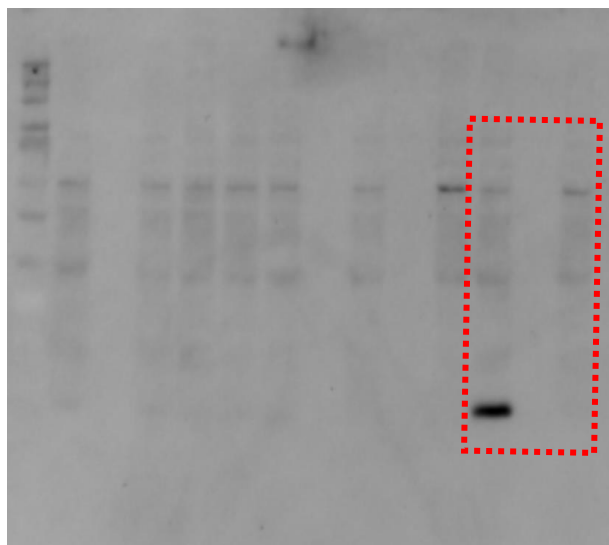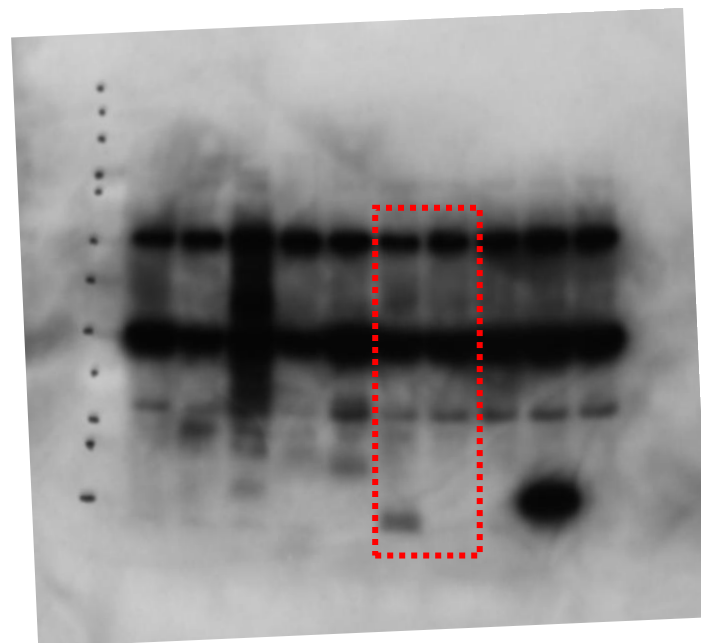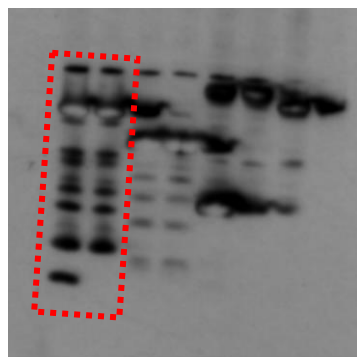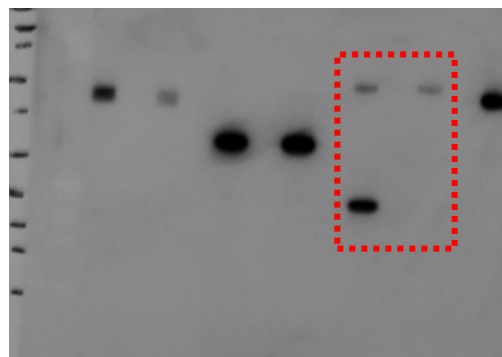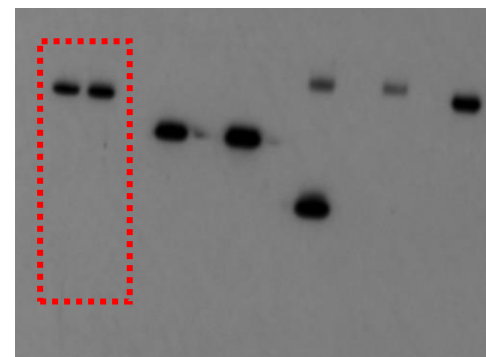

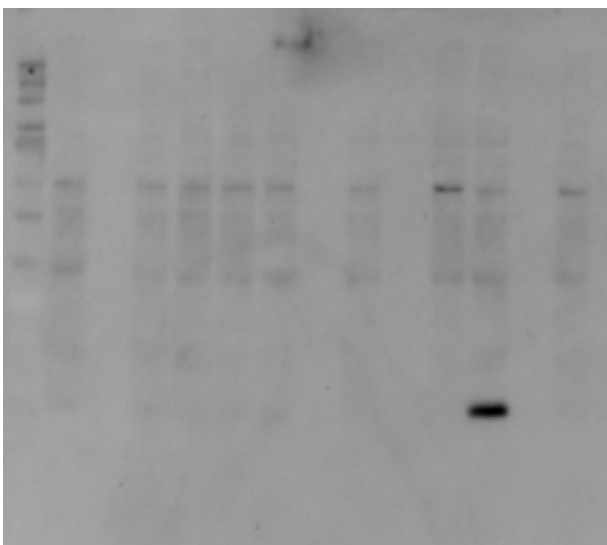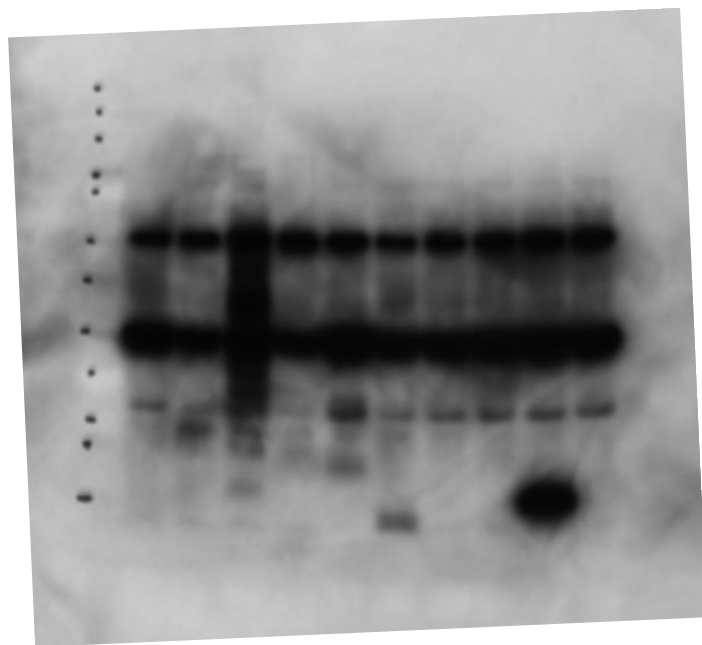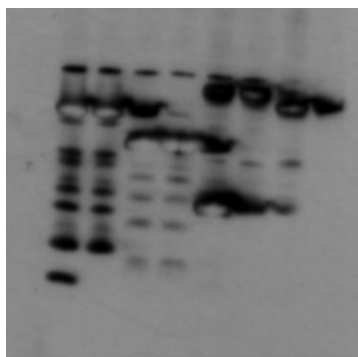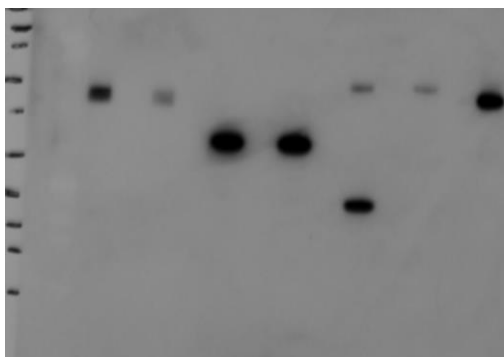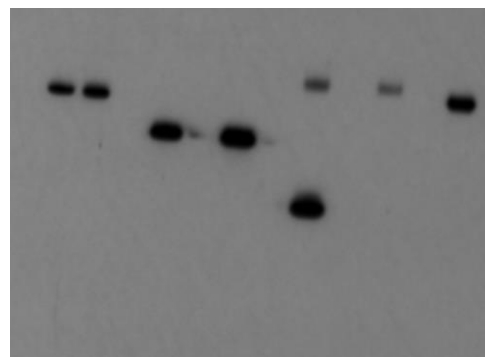

Supplement: fig6-figsupp2-data1 [file Source data summary Figure 6 Figure Supplement 2.pdf › Source data summary Figure 6 Figure Supplement 2.pdf]
